# Supplementary material for: Investigation of a potential HCHO measurement artifact from ISOPOOH
Source: Copernicus journal article supplement (doi:10.5194/amt-2016-204), 2016-06-16
Supplement: Supplementary file 1 [file amt-2016-204-supplement.pdf]

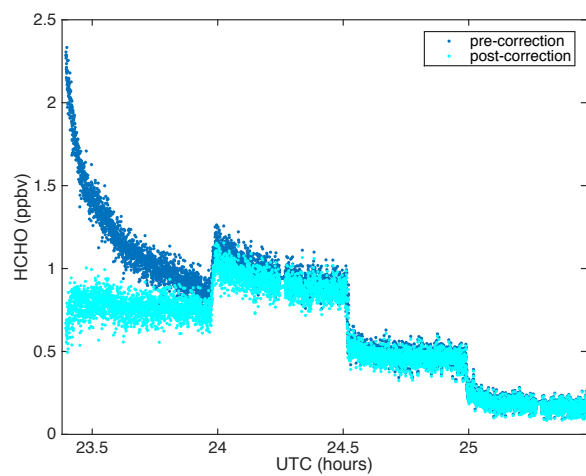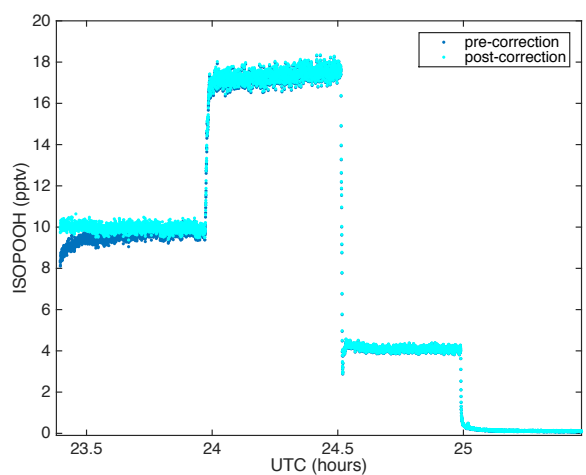

**Figure S1: HCHO (Top Panel) and (1,2)-ISOPOOH (Bottom Panel) time series for the humid air conversion experiment (E7). The correction for upstream conversion described in Section 3.0 converts pre-correction data (blue) to post-correction data (cyan).**

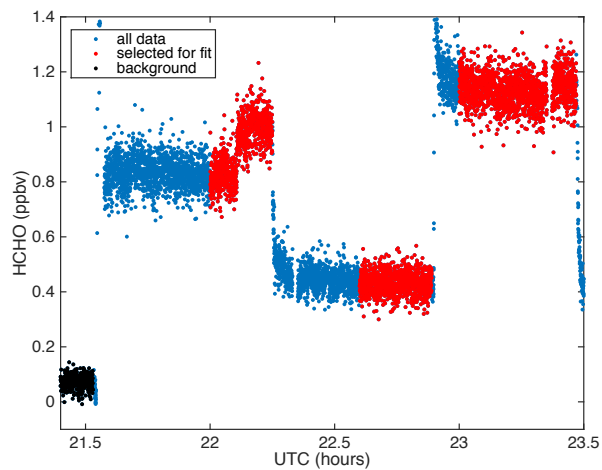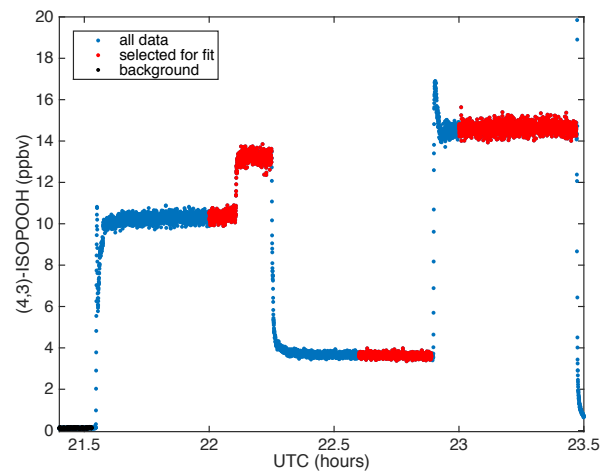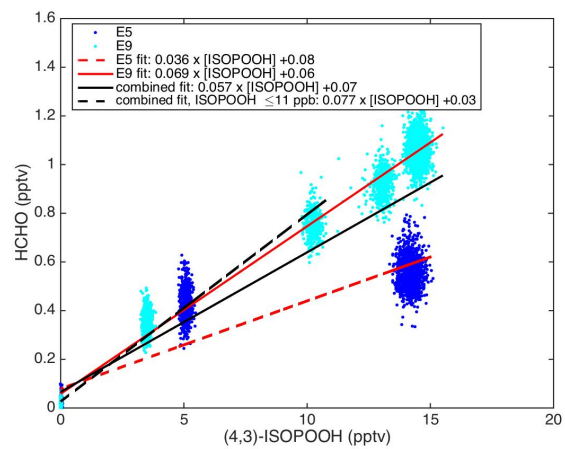

5 **Figure S2: HCHO (Top Panel) and (4,3)-ISOPROOH (Middle Panel) time series of dry air conversion experiment E9. (Bottom Panel) Linear fits to the two experiments E5 and E9 individually (red lines) and together for all data (solid black line) and data with ISOPROOH  $\leq$  11 ppbv (dashed black line).**

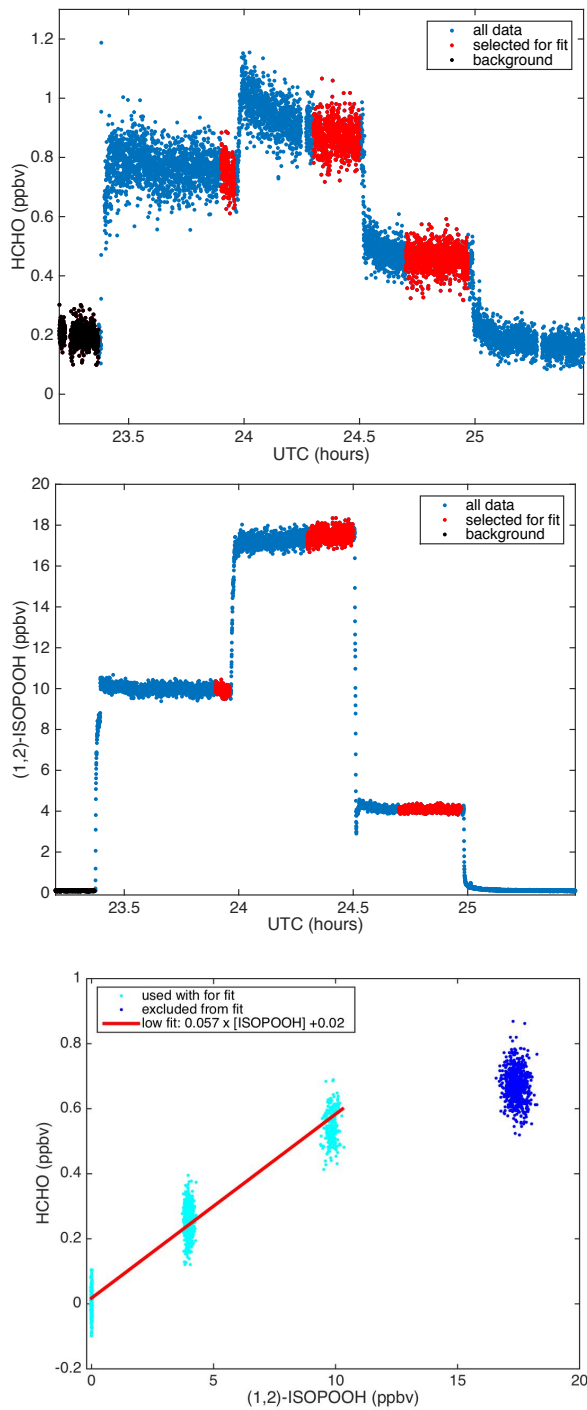

5 **Figure S3: HCHO (Top Panel) and (1,2)-ISOPROOH (Middle Panel) time series for the humid air conversion experiment (E7). (Bottom Panel) Linear fit to the linear portion of the data.**

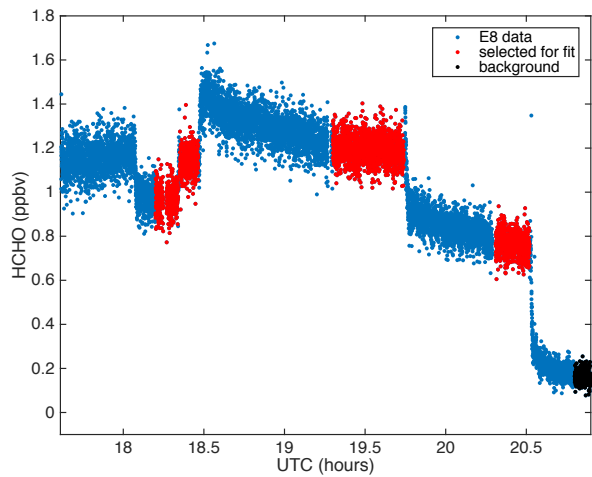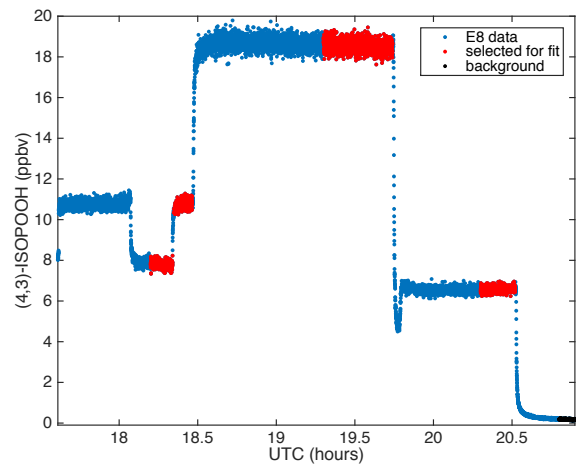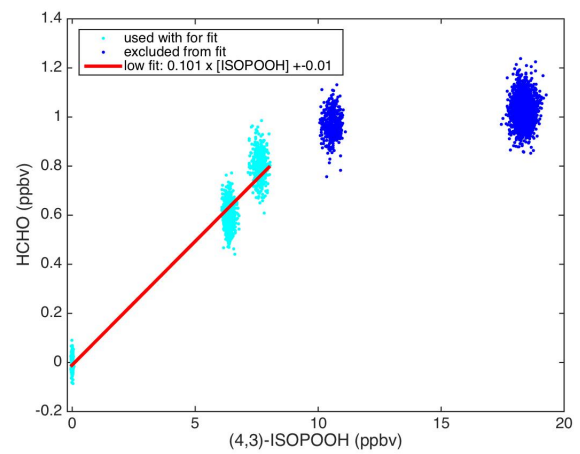

5 **Figure S4: HCHO (Top Panel) and (4,3)-ISOPROOH (Middle Panel) time series for the humid air conversion experiment (E8). (Bottom Panel) Linear fit to the linear portion of the data.**
